# Supplementary material for: A Randomized Controlled Trial Comparing Foster Care and Institutional Care for Children With Signs of Reactive Attachment Disorder
Source: Atypon-hosted journal article supplement (doi:10.1176/appi.ajp.2011.11050748), 2012-03-08

Figure 1. Supplemental Online Material

Flow of participants through the Bucharest Early Intervention Project: Institution (randomized) and Community (not randomized) by 8 year assessment

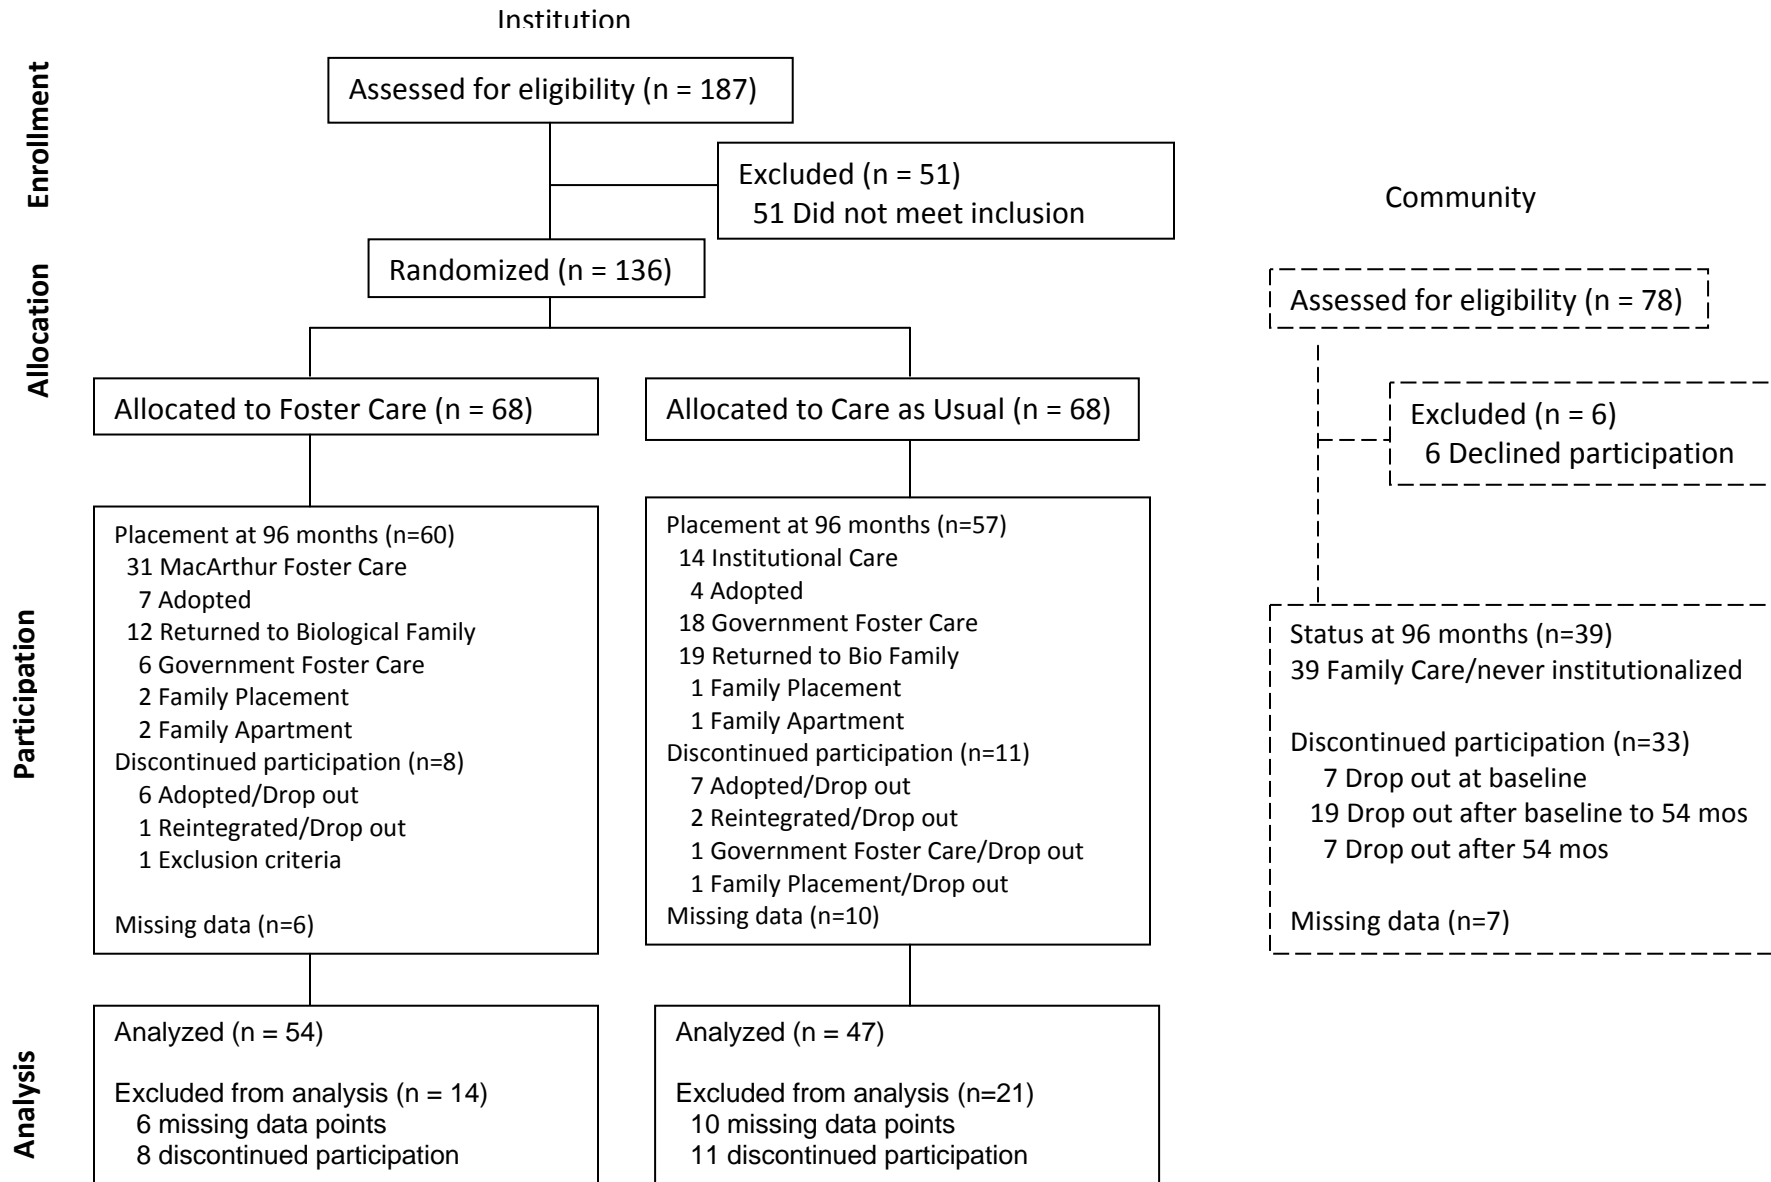

Supplement: appi.ajp.2011.11050748.ds001.pdf [file appi.ajp.2011.11050748.ds001.pdf]
